# Supplementary material for: Oncolytic herpesvirus expressing PD-L1 BiTE for cancer therapy: exploiting tumor immune suppression as an opportunity for targeted immunotherapy
Source: PubMed Central journal article supplement (PMC8026026; doi:10.1136/jitc-2020-001292), 2021-04-05
Supplement: jitc-2020-001292supp003.pdf [file jitc-2020-001292supp003.pdf]

**Supplementary Table-1**

| <b>Sample</b> | <b>Cancer Type</b>     |
|---------------|------------------------|
| Patient 1     | Ovarian                |
| Patient 2     | Gastric adenocarcinoma |
| Patient 3     | Oesophageal            |
| Patient 4     | Pancreatic             |
| Patient 5     | Breast                 |
| Patient 6     | Angiosarcoma           |
| Patient 7     | Breast                 |
| Patient 8     | Peritoneum             |
| Patient 9     | Breast                 |
| Patient 10    | Breast                 |
| Patient 11    | Breast                 |
| Patient 12    | Ovarian                |
| Patient 13    | Colorectal             |
| Patient 14    | Breast                 |
| Patient 15    | Ovarian                |
| Fluid 1       | Colorectal             |
| Fluid 2       | Ovarian                |
| Fluid 3       | Ovarian                |
| Fluid 4       | Cholangiocarcinoma     |
| Fluid 5       | Pancreatic             |
| Fluid 6       | Angiosarcoma           |
| Fluid 7       | Breast                 |
| Fluid 8       | Breast                 |
