# Supplementary material for: Oncolytic herpesvirus expressing PD-L1 BiTE for cancer therapy: exploiting tumor immune suppression as an opportunity for targeted immunotherapy
Source: PubMed Central journal article supplement (PMC8026026; doi:10.1136/jitc-2020-001292), 2021-04-05
Supplement: jitc-2020-001292supp006.pdf [file jitc-2020-001292supp006.pdf]

## Supplementary Figure 4

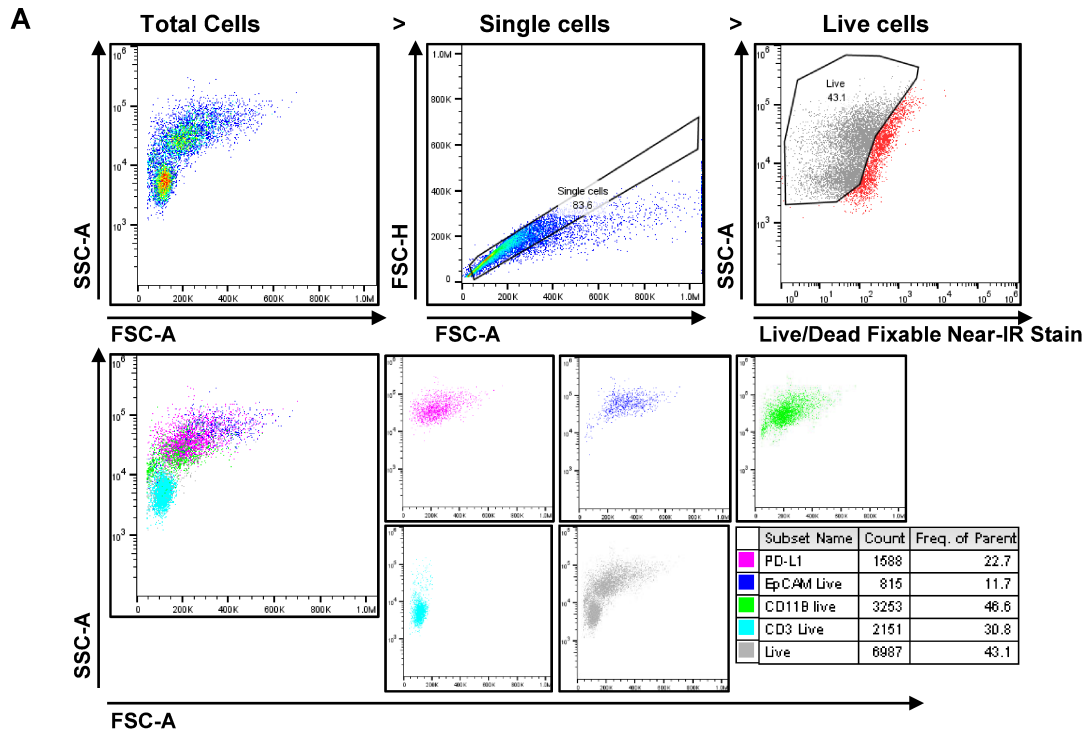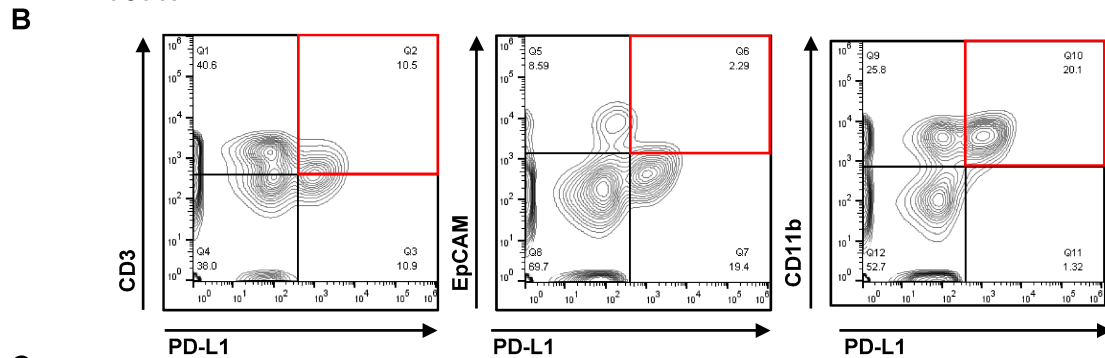

**C**

| Sample ID  | Cancer Type  | EpCAM+, PD-L1+ (%) | CD3+, PD-L1+ (%) | CD11b+, PD-L1+ (%) |
|------------|--------------|--------------------|------------------|--------------------|
| Patient 5  | Breast       | 0.81               | 0.49             | NA                 |
| Patient 6  | Angiosarcoma | 4.63               | 2.19             | NA                 |
| Patient 7  | Breast       | 3.34               | 3.79             | NA                 |
| Patient 8  | Peritoneum   | 9.2                | 5.9              | NA                 |
| Patient 10 | Breast       | 8.47               | 6.93             | NA                 |
| Patient 13 | Colorectal   | 2.29               | 10.5             | 20.1               |
| Patient 14 | Breast       | 10.4               | 11.1             | 10.2               |
| Patient 15 | Ovarian      | 5.16               | 26.7             | 38.7               |
