# Supplementary material for: Oncolytic herpesvirus expressing PD-L1 BiTE for cancer therapy: exploiting tumor immune suppression as an opportunity for targeted immunotherapy
Source: PubMed Central journal article supplement (PMC8026026; doi:10.1136/jitc-2020-001292), 2021-04-05

### Supplementary Figure 7

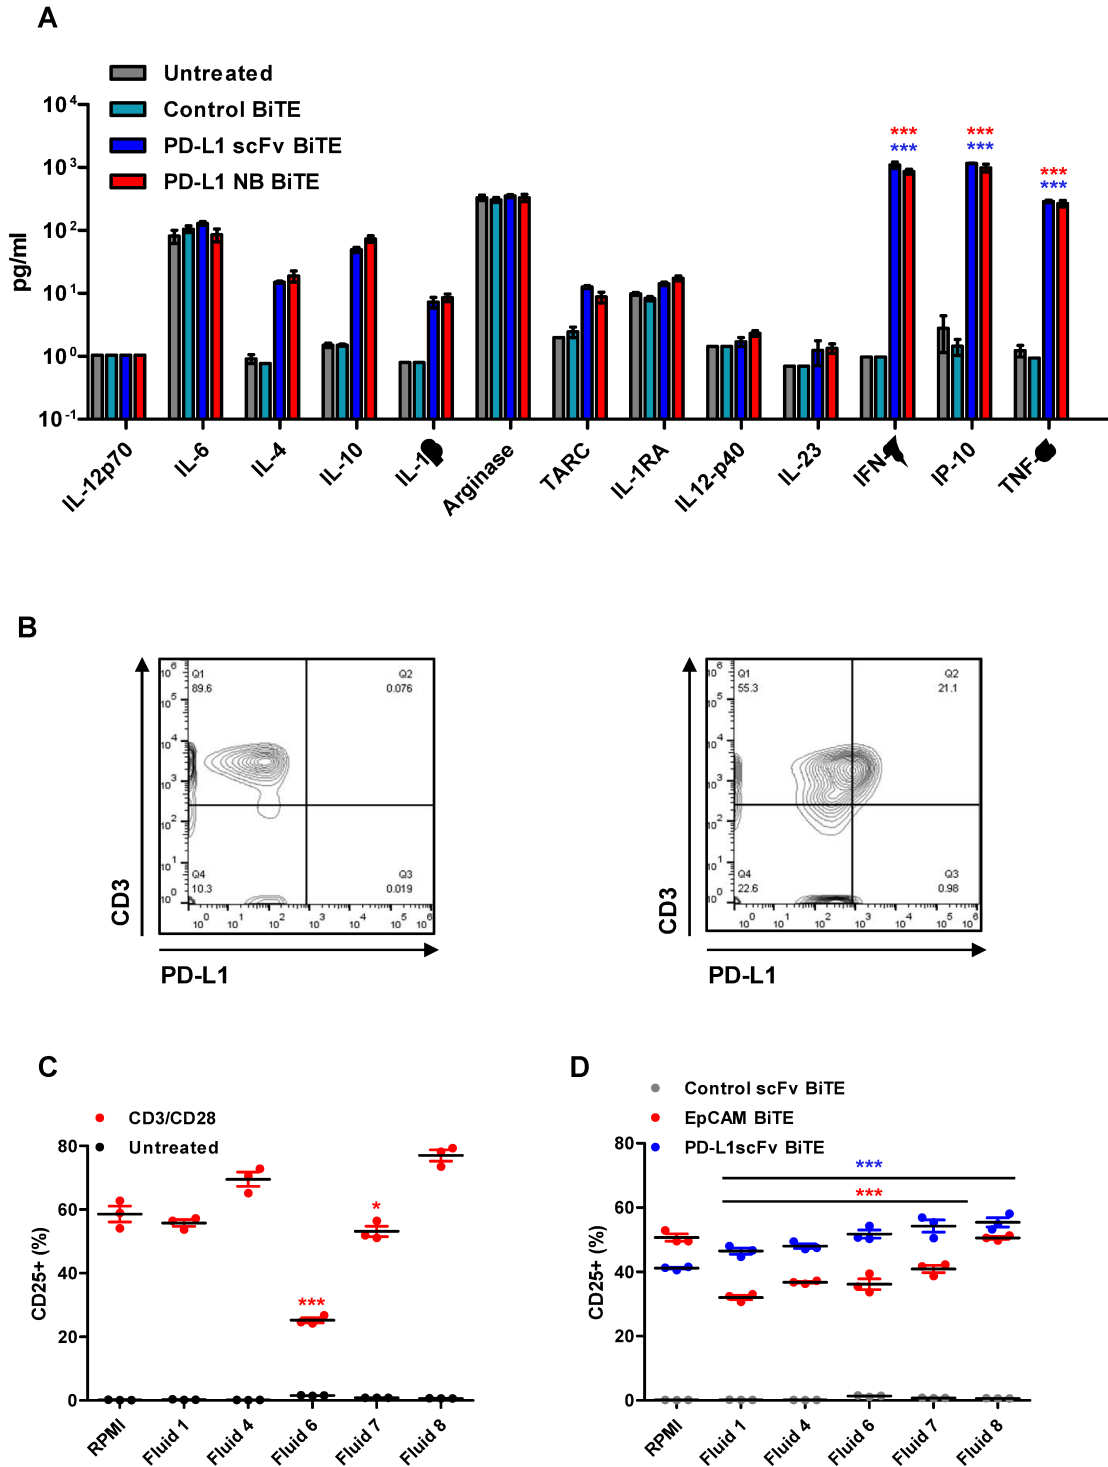

Supplement: jitc-2020-001292supp010.pdf [file jitc-2020-001292supp010.pdf]
