# Supplementary material for: Oncolytic herpesvirus expressing PD-L1 BiTE for cancer therapy: exploiting tumor immune suppression as an opportunity for targeted immunotherapy
Source: PubMed Central journal article supplement (PMC8026026; doi:10.1136/jitc-2020-001292), 2021-04-05

## Supplementary Figure 15

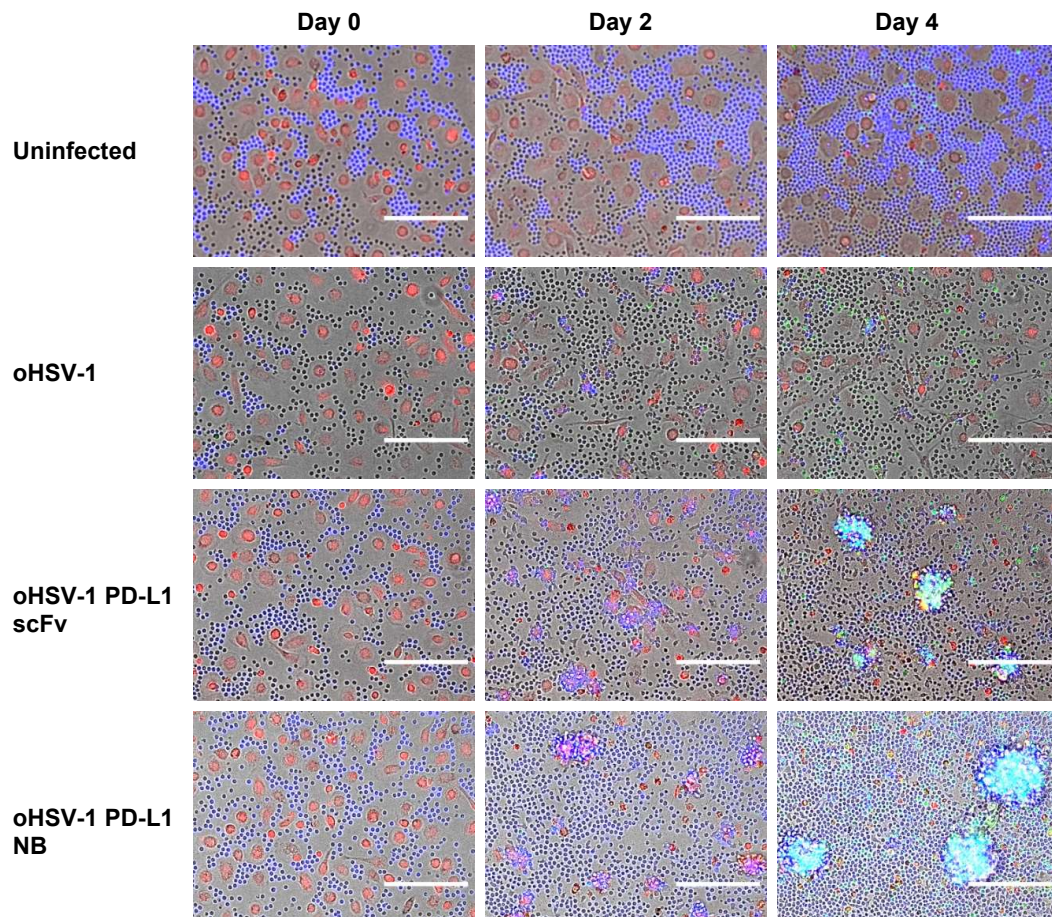

Supplement: jitc-2020-001292supp022.pdf [file jitc-2020-001292supp022.pdf]
