# Supplementary material for: Oncolytic herpesvirus expressing PD-L1 BiTE for cancer therapy: exploiting tumor immune suppression as an opportunity for targeted immunotherapy
Source: PubMed Central journal article supplement (PMC8026026; doi:10.1136/jitc-2020-001292), 2021-04-05
Supplement: jitc-2020-001292supp025.pdf [file jitc-2020-001292supp025.pdf]

## Supplementary Figure 18

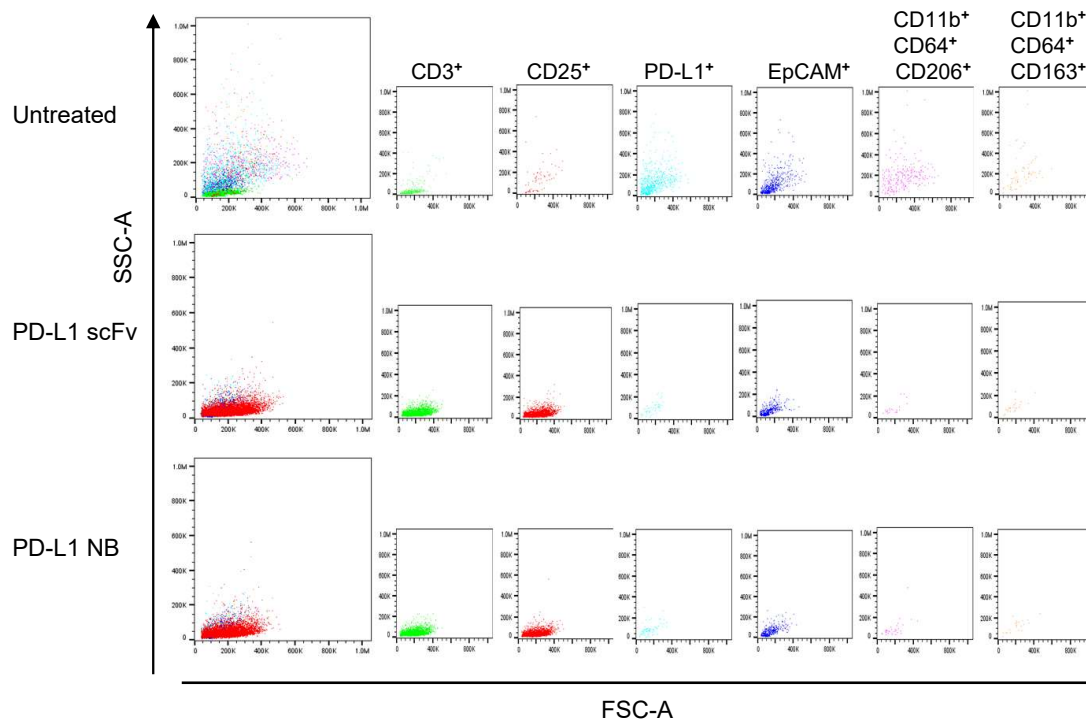

| Subset | %    |
|--------|------|
| CD25   | 0.73 |
| PD-L1  | 1.49 |
| EpCAM  | 2.2  |
| CD 206 | 8.49 |
| CD 163 | 2.73 |

Untreated

| Subset | %    |
|--------|------|
| CD25   | 96.8 |
| PD-L1  | 0.10 |
| EpCAM  | 1.55 |
| CD 206 | 1.38 |
| CD 163 | 1.12 |

PD-L1 scFv

| Subset | %    |
|--------|------|
| CD25   | 93.4 |
| PD-L1  | 0.23 |
| EpCAM  | 1.69 |
| CD 206 | 1.43 |
| CD 163 | 1.03 |

PD-L1 NB
